# Supplementary material
Source: Springer Nature journal article supplement (https://www.springermedizin.de/resource/supplementary/12947_2011_436_MOESM2_ESM.pdf/9555762)

# Logistic regression for cognitive dysfunction

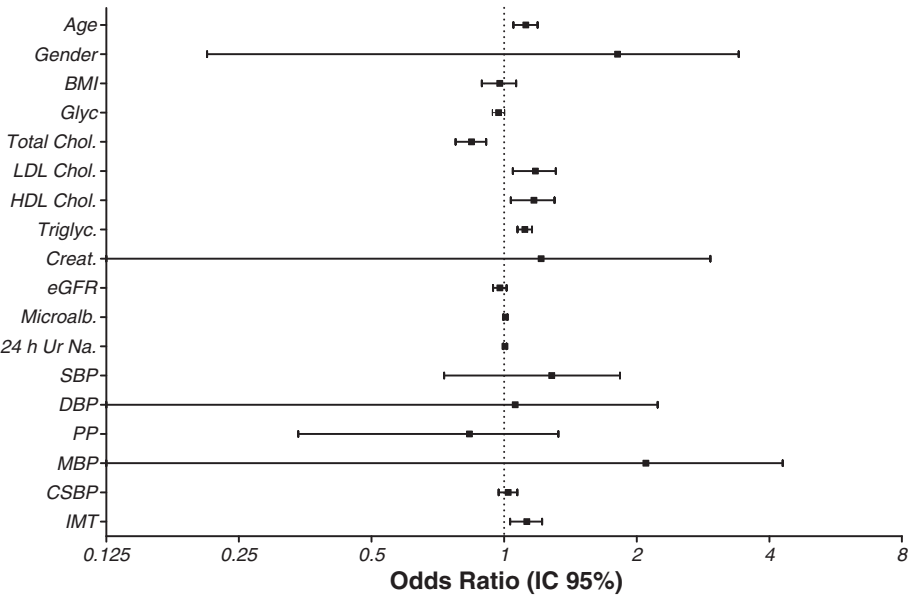

Supplement: MOESM2 [file 9555762]
